# Supplementary material for: Applications of synchrotron-based micro-imaging techniques to the chemical analysis of ancient paintings
Source: Royal Society of Chemistry journal article supplement (doi:10.1039/b801358f), 2008-01-01

# Applications of synchrotron-based micro-imaging techniques to the chemical analysis of ancient paintings

Marine Cotte<sup>1,2\*</sup>, Jean Susini<sup>2</sup>, V. Armando Solé<sup>2</sup>, Yoko Taniguchi<sup>3</sup>, Javier Chillida<sup>4</sup>, Emilie Checroun<sup>5</sup>, Philippe Walter<sup>1</sup>

## Supporting information

Stratigraphy of the paint structure of Foladi Cave 4 (sample FDM55), from  $\mu$ FTIR,  $\mu$ XRF,  $\mu$ XRD analyses.

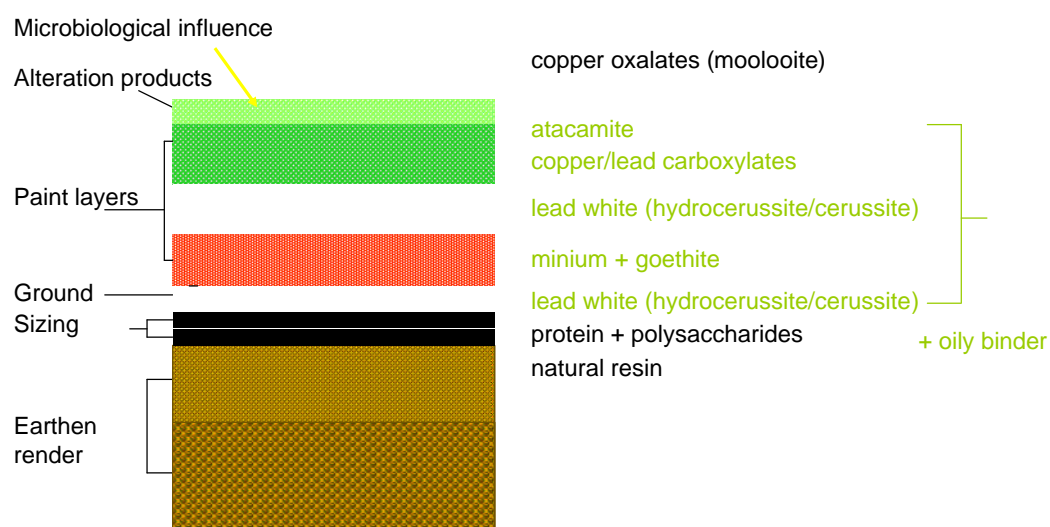

Supplement: b801358f.pdf [file b801358f.pdf]
